# Supplementary material
Source: PubMed Central journal article supplement (PMC3208620)
Supplement: supp_45_4_711__2.pdf [file supp_45_4_711__2.pdf]

Supplement Section Figure 1

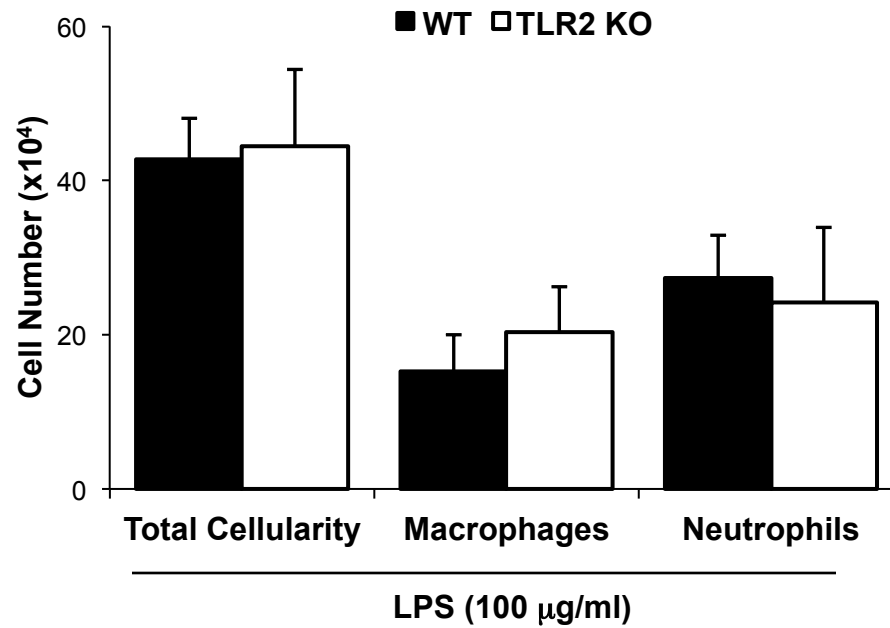

**Figure Legend:** Lung lavage cellularity is similar between wild-type (WT) and TLR2 knock-out (KO) mice following a one-time challenge with lipopolysaccharide (LPS). Lung lavage fluid mean concentration of total cells and cell differential was determined five hours after single intranasal inhalation of LPS (100 μg) in mice (N=4 mice per group).
